# Supplementary material for: Reaction Kinetics and Mechanism of VOCs Combustion on Mn-Ce-SBA-15
Source: MDPI journal article supplement (doi:10.3390/catal12060583), 2022-05-26
Supplement: s1 [file s1]

# Reaction Kinetics and Mechanism of VOCs Combustion on Mn-Ce-SBA-15

Anton Naydenov <sup>1,\*</sup>, Ralitsa Velinova <sup>1</sup>, Jean-Luc Blin <sup>2</sup>, Laure Michelin <sup>3</sup>, Bénédicte Lebeau <sup>3,4</sup>, Hristo Kolev <sup>5</sup>, Yordanka Karakirova <sup>5</sup>, Daniela Karashanova <sup>6</sup>, Loïc Vidal <sup>3,4</sup>, Anna Dotzeva <sup>5</sup>, Krasimir Tenchev <sup>5</sup> and Silviya Todorova <sup>5</sup>

- <sup>1</sup> Institute of General and Inorganic Chemistry, Bulgarian Academy of Sciences, 1113 Sofia, Bulgaria; raligeorgieva@svr.igic.bas.bg
- <sup>2</sup> Laboratoire Lorrain de Chimie Moléculaire L2CM, UMR7053, Faculté des Sciences et Technologies, Université de Lorraine/CNRS, CEDEX, F-54506 Vandoeuvre-lès-Nancy, France; jean-luc.blin@univ-lorraine.fr
- <sup>3</sup> Institut de Science des Matériaux de Mulhouse, Université de Haute Alsace (UHA)/CNRS, IS2M, UMR 7361, CEDEX, F-68100 Mulhouse, France; laure.michelin@uha.fr (L.M.); benedict.lebeau@uha.fr (B.L.); loic.vidal@uha.fr (L.V.)
- <sup>4</sup> Université de Strasbourg, F-67000 Strasbourg, France
- <sup>5</sup> Institute of Catalysis, Bulgarian Academy of Sciences, 1113 Sofia, Bulgaria; hgkolev@ic.bas.bg (H.K.); daniepr@ic.bas.bg (Y.K.); anna200485@gmail.com (A.D.); tenchev@ic.bas.bg (K.T.); todorova@ic.bas.bg (S.T.)
- <sup>6</sup> Institute of Optical Materials and Technologies “Acad. Jordan Malinowski”, Bulgarian Academy of Sciences, 1113 Sofia, Bulgaria; dkarashanova@yahoo.com
- \* Correspondence: naydenov@svr.igic.bas.bg; Tel.: +359-02-979-25-36

**Table S1.** Binding energies and FWHM of corresponding’s curve-fitting peaks based on standard spectra of Ce<sup>3+</sup> and Ce<sup>4+</sup>.

| Ce/SBA 15    |                       |                         |                          |                       |                         |                          |                        |                        |                        |                        |
|--------------|-----------------------|-------------------------|--------------------------|-----------------------|-------------------------|--------------------------|------------------------|------------------------|------------------------|------------------------|
| Ox. state    | 4+                    | 4+                      | 4+ Sat.                  | 4+                    | 4+                      | 4+ Sat.                  | 3+                     | 3+                     | 3+                     | 3+                     |
| name         | Ce3d <sub>5/2</sub> V | Ce3d <sub>5/2</sub> VII | Ce3d <sub>5/2</sub> VIII | Ce3d <sub>3/2</sub> U | Ce3d <sub>3/2</sub> UII | Ce3d <sub>3/2</sub> UIII | Ce3d <sub>5/2</sub> V0 | Ce3d <sub>5/2</sub> VI | Ce3d <sub>3/2</sub> U0 | Ce3d <sub>3/2</sub> UI |
| BE, eV       | 882.22                | 888.62                  | 898.01                   | 900.62                | 907.02                  | 917.14                   | 881.5                  | 885.2                  | 900.1                  | 903.8                  |
| FWHM, eV     | 3.47                  | 2.67                    | 3.5                      | 3.31                  | 2.1                     | 2.86                     | 2.99                   | 3.49                   | 2.88                   | 3.45                   |
| MnCe (1:0.5) |                       |                         |                          |                       |                         |                          |                        |                        |                        |                        |
| BE, eV       | 882.48                | 888.88                  | 898.01                   | 900.88                | 907.28                  | 916.61                   | 881                    | 884.7                  | 899.6                  | 903.3                  |
| FWHM, eV     | 2.21                  | 3.78                    | 3.04                     | 3.4                   | 2.53                    | 2.7                      | 2.99                   | 3.5                    | 3.49                   | 3.49                   |
| MnCe (1:2)   |                       |                         |                          |                       |                         |                          |                        |                        |                        |                        |
| BE, eV       | 882.14                | 888.54                  | 898.01                   | 900.87                | 907.14                  | 917.35                   | 881.29                 | 884.99                 | 899.89                 | 903.59                 |
| FWHM, eV     | 2.67                  | 2.57                    | 3.49                     | 3.79                  | 2.51                    | 2.82                     | 3.49                   | 3.79                   | 3.8                    | 3.8                    |

**Table S2.** Binding energies, FWHM and splitting of corresponding's curve-fitting peaks of standard spectra of Ce<sup>3+</sup> and Ce<sup>4+</sup>.

| Standard Ce <sup>4+</sup> |                        |                         |                          |                        |                         |                          |
|---------------------------|------------------------|-------------------------|--------------------------|------------------------|-------------------------|--------------------------|
| Ox. state                 | 4+                     | 4+                      | 4+ Sat.                  | 4+                     | 4+                      | 4+ Sat.                  |
| name                      | Ce3d <sub>5/2</sub> V  | Ce3d <sub>5/2</sub> VII | Ce3d <sub>5/2</sub> VIII | Ce3d <sub>3/2</sub> U  | Ce3d <sub>3/2</sub> UII | Ce3d <sub>3/2</sub> UIII |
| BE, eV                    | 882.68                 | 889.08                  | 898.38                   | 901.08                 | 907.48                  | 916.78                   |
| FWHM, eV                  | 2.76                   | 4.2                     | 2.29                     | 2.52                   | 4.47                    | 2.17                     |
| Δ=V+, eV                  | V                      | 6.4                     | 15.7                     | 18.4                   | 24.8                    | 34.1                     |
| Standard Ce <sup>3+</sup> |                        |                         |                          |                        |                         |                          |
| Ox. State                 | 3+                     | 3+                      | 3+                       | 3+                     |                         |                          |
| name                      | Ce3d <sub>5/2</sub> V0 | Ce3d <sub>5/2</sub> VI  | Ce3d <sub>3/2</sub> U0   | Ce3d <sub>3/2</sub> UI |                         |                          |
| BE, eV                    | 881.02                 | 884.72                  | 899.62                   | 903.32                 |                         |                          |
| FWHM, eV                  | 2.9                    | 3.57                    | 3.52                     | 3.89                   |                         |                          |
| Δ=V0+ , eV                | V0                     | 3.7                     | 18.6                     | 22.3                   |                         |                          |
